# Supplementary material for: Single Nucleotide Polymorphism Induces Divergent Dynamic Patterns in CYP3A5: A Microsecond Scale Biomolecular Simulation of Variants Identified in Sub-Saharan African Populations
Source: MDPI journal article supplement (doi:10.3390/ijms22157786), 2021-07-21
Supplement: s1 [file s1]

# Single nucleotide polymorphism induces divergent dynamic patterns in CYP3A5: a microsecond scale biomolecular simulation of variants identified in Sub-Saharan African populations (Supplementary materials)

Houcemeddine Othman<sup>1</sup>, Jorge da Rocha<sup>1,2</sup>, and Scott Hazelhurst<sup>1,3</sup>

<sup>1</sup>Sydney Brenner Institute for Molecular Bioscience, Faculty of Health Sciences, University of the Witwatersrand, Johannesburg, South Africa.

<sup>2</sup>Division of Human Genetics, National Health Laboratory Service, and School of Pathology, Faculty of Health Sciences, University of the Witwatersrand, Johannesburg, South Africa.

<sup>3</sup>School of Electrical and Information Engineering, University of the Witwatersrand, Johannesburg, South Africa.

## Supplementary material 1: CYP3A5 drugs

This list of drugs was compiled from DrugBank database.

| Drug                  | type      |
|-----------------------|-----------|
| Alfentanil            | substrate |
| Alprazolam            | substrate |
| Ambrisentan           | substrate |
| Amitriptyline         | substrate |
| Amprenavir            | substrate |
| Anastrozole           | substrate |
| Apixaban              | substrate |
| Apomorphine           | substrate |
| Argatroban            | substrate |
| Aripiprazole          | substrate |
| Aripiprazole lauroxil | substrate |
| Artemether            | substrate |
| Astemizole            | substrate |
| Atorvastatin          | substrate |
| Axitinib              | substrate |
| Azelastine            | substrate |
| Azimilide             | substrate |
| Benidipine            | substrate |
| Bimatoprost           | substrate |
| Buprenorphine         | substrate |
| Buspirone             | substrate |
| Cabazitaxel           | substrate |

|                          |           |
|--------------------------|-----------|
| Cerivastatin             | substrate |
| Cethromycin              | substrate |
| Chloroquine              | substrate |
| Chlorpheniramine         | substrate |
| Cilostazol               | substrate |
| Cisapride                | substrate |
| Clindamycin              | substrate |
| Clonidine                | substrate |
| Clopidogrel              | substrate |
| Copanlisib               | substrate |
| Cyclophosphamide         | substrate |
| Cyclosporine             | substrate |
| Daclatasvir              | substrate |
| Dapsone                  | substrate |
| Dasatinib                | substrate |
| Deutetrabenazine         | substrate |
| Dexloxiglumide           | substrate |
| Diazepam                 | substrate |
| Disulfiram               | substrate |
| Docetaxel                | substrate |
| Domperidone              | substrate |
| Doravirine               | substrate |
| Dutasteride              | substrate |
| Elexacaftor              | substrate |
| Eplerenone               | substrate |
| Erlotinib                | substrate |
| Estradiol                | substrate |
| Estradiol acetate        | substrate |
| Estradiol benzoate       | substrate |
| Estradiol cypionate      | substrate |
| Estradiol dienanthate    | substrate |
| Estradiol valerate       | substrate |
| Estrone                  | substrate |
| Ethinylestradiol         | substrate |
| Ethosuximide             | substrate |
| Etoposide                | substrate |
| Felodipine               | substrate |
| Fenfluramine             | substrate |
| Finasteride              | substrate |
| Fluoxetine               | substrate |
| Flutamide                | substrate |
| Fluvastatin              | substrate |
| Gefitinib                | substrate |
| Glyburide                | substrate |
| Halofantrine             | substrate |
| Haloperidol              | substrate |
| Hydrocortisone           | substrate |
| Hydrocortisone aceponate | substrate |
| Hydrocortisone acetate   | substrate |
| Hydrocortisone butyrate  | substrate |
| Hydrocortisone cypionate | substrate |

|                              |           |
|------------------------------|-----------|
| Hydrocortisone phosphate     | substrate |
| Hydrocortisone probutate     | substrate |
| Hydrocortisone valerate      | substrate |
| Hydroxyprogesterone caproate | substrate |
| Hydroxyzine                  | substrate |
| Ibrutinib                    | substrate |
| Ifosfamide                   | substrate |
| Iloperidone                  | substrate |
| Irinotecan                   | substrate |
| Istradefylline               | substrate |
| Ivacaftor                    | substrate |
| Lapatinib                    | substrate |
| Lemborexant                  | substrate |
| Lercanidipine                | substrate |
| Levonorgestrel               | substrate |
| Lidocaine                    | substrate |
| Loratadine                   | substrate |
| Lorlatinib                   | substrate |
| Loxoprofen                   | substrate |
| Metronidazole                | substrate |
| Mifepristone                 | substrate |
| Mycophenolate mofetil        | substrate |
| Naldemedine                  | substrate |
| Nateglinide                  | substrate |
| Nevirapine                   | substrate |
| Nifedipine                   | substrate |
| Nisoldipine                  | substrate |
| Nitrendipine                 | substrate |
| Nortriptyline                | substrate |
| Olaparib                     | substrate |
| Omega-3-carboxylic acids     | substrate |
| Ondansetron                  | substrate |
| Oxybutynin                   | substrate |
| Oxycodone                    | substrate |
| Paclitaxel                   | substrate |
| Paliperidone                 | substrate |
| Paritaprevir                 | substrate |
| Pentamidine                  | substrate |
| Perampanel                   | substrate |
| Pimozide                     | substrate |
| Ponatinib                    | substrate |
| Praziquantel                 | substrate |
| Progesterone                 | substrate |
| Propranolol                  | substrate |
| Quetiapine                   | substrate |
| Quinacrine                   | substrate |
| Relugolix                    | substrate |
| Risdiplam                    | substrate |
| Rivaroxaban                  | substrate |
| Romidepsin                   | substrate |
| Salmeterol                   | substrate |

|                          |               |
|--------------------------|---------------|
| Saxagliptin              | substrate     |
| Selpercatinib            | substrate     |
| Selumetinib              | substrate     |
| Sildenafil               | substrate     |
| Simvastatin              | substrate     |
| Sirolimus                | substrate     |
| Sorafenib                | substrate     |
| Sunitinib                | substrate     |
| Tacrolimus               | substrate     |
| Tadalafil                | substrate     |
| Tamoxifen                | substrate     |
| Tazemetostat             | substrate     |
| Tegafur                  | substrate     |
| Tenapanor                | substrate     |
| Teniposide               | substrate     |
| Terfenadine              | substrate     |
| Testosterone             | substrate     |
| Testosterone cypionate   | substrate     |
| Testosterone enanthate   | substrate     |
| Testosterone undecanoate | substrate     |
| Tezacaftor               | substrate     |
| Trastuzumab emtansine    | substrate     |
| Trazodone                | substrate     |
| Tretinoin                | substrate     |
| Triazolam                | substrate     |
| Udenafil                 | substrate     |
| Umifenovir               | substrate     |
| Valbenazine              | substrate     |
| Valproic acid            | substrate     |
| Vardenafil               | substrate     |
| Vicriviroc               | substrate     |
| Vincristine              | substrate     |
| Vortioxetine             | substrate     |
| Zaleplon                 | substrate     |
| Zanubrutinib             | substrate     |
| Zonisamide               | substrate     |
| Midazolam                | substraes     |
| Ambroxol acefyllinate    | not specified |
| Brigatinib               | not specified |
| Foretinib                | not specified |
| Dolutegravir             | not specified |
| Elagolix                 | not specified |
| Mirodenafil              | not specified |
| Moxisylyte               | not specified |
| Myrrh                    | not specified |
| Rhein                    | not specified |
| Acalabrutinib            | inhibitor     |
| Amlodipine               | inhibitor     |
| Boceprevir               | inhibitor     |
| Cannabidiol              | inhibitor     |
| Cenobamate               | inhibitor     |



|                        |           |
|------------------------|-----------|
| Chloramphenicol        | inhibitor |
| Cimetidine             | inhibitor |
| Ciprofloxacin          | inhibitor |
| Clarithromycin         | inhibitor |
| Clofazimine            | inhibitor |
| Cobicistat             | inhibitor |
| Crizotinib             | inhibitor |
| Curcumin sulfate       | inhibitor |
| Delavirdine            | inhibitor |
| Diltiazem              | inhibitor |
| Ditiocarb              | inhibitor |
| Dronedarone            | inhibitor |
| Elbasvir               | inhibitor |
| Erythromycin           | inhibitor |
| Fluconazole            | inhibitor |
| Fluticasone propionate | inhibitor |
| Fluvoxamine            | inhibitor |
| Gestodene              | inhibitor |
| Glecaprevir            | inhibitor |
| Idelalisib             | inhibitor |
| Imatinib               | inhibitor |
| Indinavir              | inhibitor |
| Isavuconazole          | inhibitor |
| Itraconazole           | inhibitor |
| Ketoconazole           | inhibitor |
| Letermovir             | inhibitor |
| Lonafarnib             | inhibitor |
| Lopinavir              | inhibitor |
| Mebendazole            | inhibitor |
| Medical Cannabis       | inhibitor |
| Methylene blue         | inhibitor |
| Mibefradil             | inhibitor |
| Nabiximols             | inhibitor |
| Nefazodone             | inhibitor |
| Nelfinavir             | inhibitor |
| Nicardipine            | inhibitor |
| Olanzapine             | inhibitor |
| Osilodrostat           | inhibitor |
| Oxymetholone           | inhibitor |
| Phenelzine             | inhibitor |
| Pibrentasvir           | inhibitor |
| Remoxipride            | inhibitor |
| Ritonavir              | inhibitor |
| Rucaparib              | inhibitor |
| Safinamide             | inhibitor |
| Saquinavir             | inhibitor |
| Seproxetine            | inhibitor |
| Temsirolimus           | inhibitor |
| Troglitazone           | inhibitor |
| Troleandomycin         | inhibitor |
| Tucatinib              | inhibitor |

|                                  |           |
|----------------------------------|-----------|
| Verapamil                        | inhibitor |
| Voriconazole                     | inhibitor |
| Amcinonide                       | Inducer   |
| Armodafinil                      | Inducer   |
| Asunaprevir                      | Inducer   |
| Beclomethasone dipropionate      | inducer   |
| Betamethasone                    | inducer   |
| Betamethasone phosphate          | inducer   |
| Budesonide                       | inducer   |
| Carbamazepine                    | inducer   |
| Clobetasol                       | inducer   |
| Clobetasol propionate            | inducer   |
| Clocortolone acetate             | inducer   |
| Cloprednol                       | inducer   |
| Cortisone                        | inducer   |
| Cortisone acetate                | inducer   |
| Cortivazol                       | inducer   |
| Daunorubicin                     | inducer   |
| Deflazacort                      | inducer   |
| Dexamethasone                    | inducer   |
| Dexamethasone acetate            | inducer   |
| Dexamethasone isonicotinate      | inducer   |
| Difluocortolone                  | inducer   |
| Efavirenz                        | inducer   |
| Enzalutamide                     | inducer   |
| Fluocinonide                     | inducer   |
| Fluocortolone                    | inducer   |
| Fluorometholone                  | inducer   |
| Fluprednidene                    | inducer   |
| Fluprednidene acetate            | inducer   |
| Fluticasone                      | inducer   |
| Fluticasone furoate              | inducer   |
| Halometasone                     | inducer   |
| Icotinib                         | inducer   |
| Medrysone                        | inducer   |
| Melengestrol acetate             | inducer   |
| Meprednisone                     | inducer   |
| Methylprednisolone               | inducer   |
| Methylprednisolone hemisuccinate | inducer   |
| Midostaurin                      | inducer   |
| Modafinil                        | inducer   |
| Mometasone                       | inducer   |
| Mometasone furoate               | inducer   |
| Phenobarbital                    | inducer   |
| Phenytoin                        | inducer   |
| Pralsetinib                      | inducer   |
| Prednisolone hemisuccinate       | inducer   |
| Prednisolone phosphate           | inducer   |
| Prednisone                       | inducer   |
| Prednisone acetate               | inducer   |
| Prednylidene                     | inducer   |

|               |         |
|---------------|---------|
| Quinine       | inducer |
| Reserpine     | inducer |
| Rifampicin    | inducer |
| Rifapentine   | inducer |
| Rimexolone    | inducer |
| Thalidomide   | inducer |
| Thiopental    | inducer |
| Triamcinolone | inducer |
| Oxcarbazepine | inducer |
| Paramethasone | inducer |

## Supplementary material 2: Mapping CYP3A5 amino acid variants on the protein structure

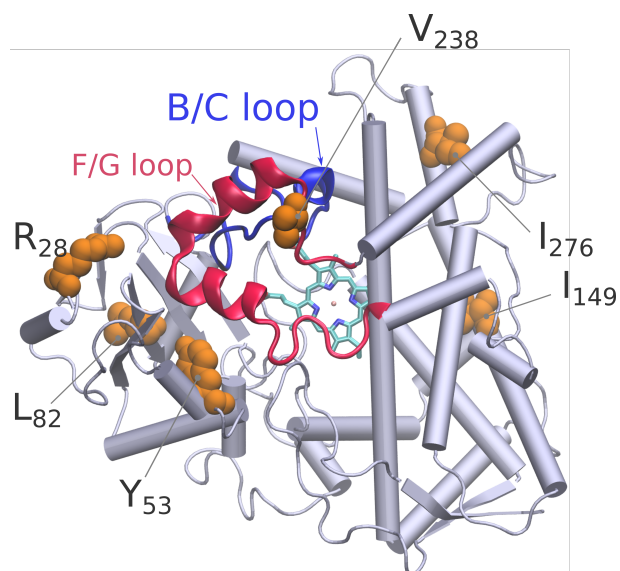

Figure S1: Position of the amino acids corresponding to the missense variants on the 3D structure of CYP3A5. The figure was generated using the Visual Molecular Dynamics program (VMD).

## Supplementary material 3: Assessing the convergence of the molecular dynamics trajectory

To assess the convergence of each trajectory we have made a clustering analysis over all the snapshots using cpptraj. We choose to make a hierarchical clustering using a cutoff value of 2 Å. The cumulative number of clusters as a function of time was calculated as well as the evolution of informational entropy according to the following formula.

$$H = - \sum_{i=1}^n p_i \log(p_i)$$

where  $p_i$  is the probability of the  $i^{th}$  found cluster, as a function of simulation time.

The wild type form, Y53C, I149T, and I276T had shown a constant number of clusters of 1 since

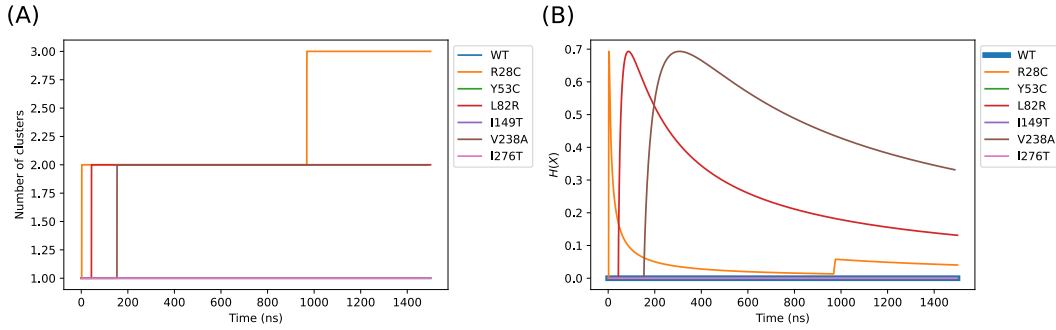

Figure S2: Analysis of the molecular dynamics simulation using the cumulated number of clusters (A) and the onstancy of the cluster entropy

the beginning of the simulation as well as an entropy value of 0. R28C, L82R, and V238A have not converged properly indicating a likely shift in the conformational space of these variants compared to the wild-type form. Since we are comparing the effect to the wild-type form, this is acceptable. However, we notice from the entropy calculation that the trajectories tend to converge at the end of the simulation.

## Supplementary material 4: Fluctuation of CYP3A5 residues

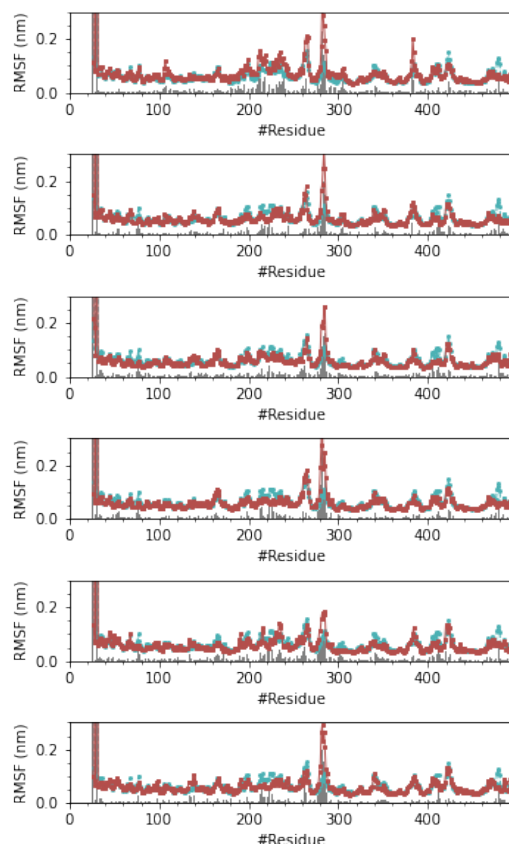

Figure S3: Root Mean Square Fluctuation of CYP3A5 residues. From top to bottom: WT, R28C, Y53C, L82R, I149T, V238A and I276T.

## Supplementary material 5: Scree plot of the first 20 eigenvalues

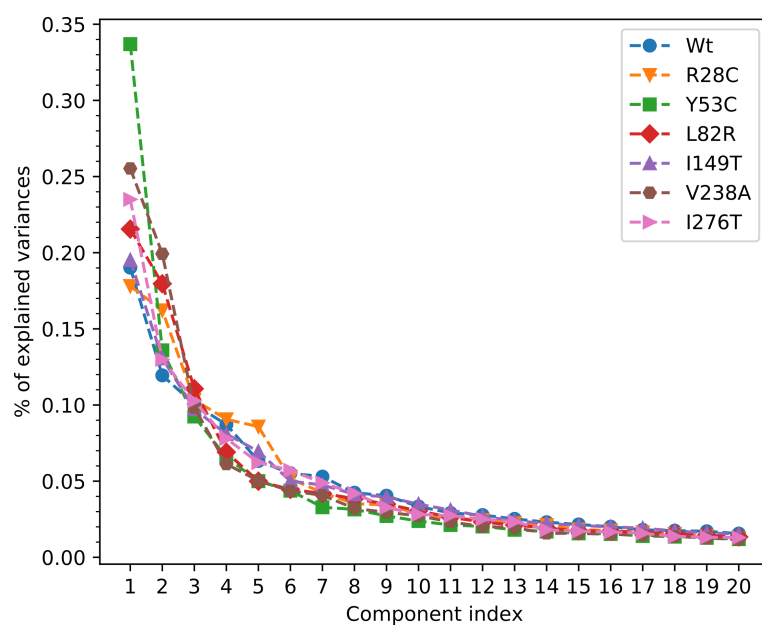

Figure S4: Scree plot showing the proportion of explained variance as a function of the component rank.

## Supplementary material 6: PC3 Vs PC4

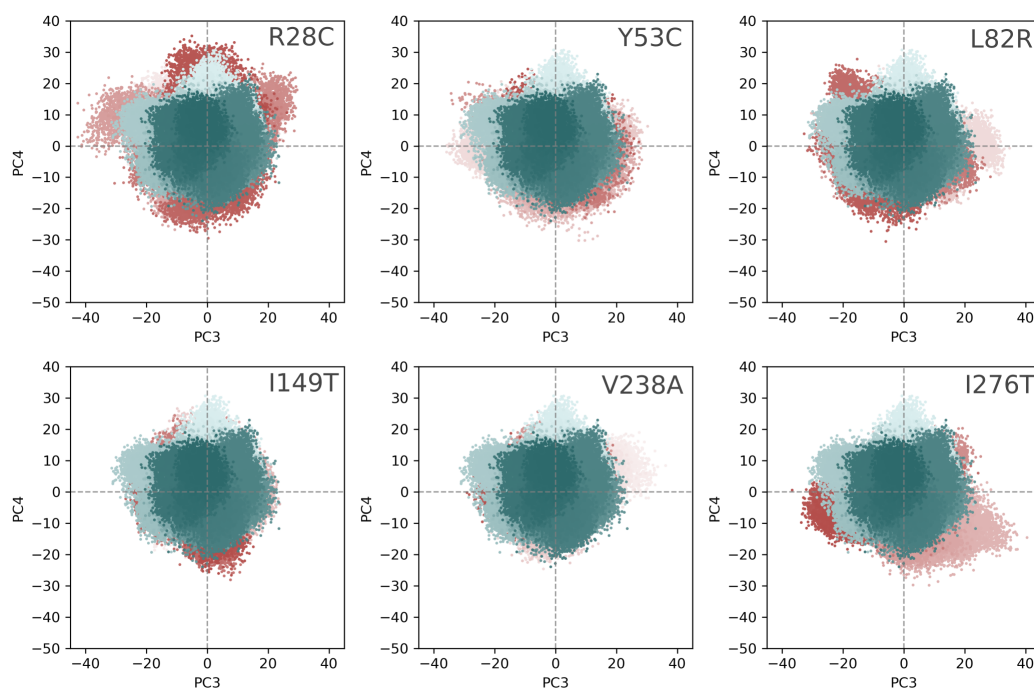

Figure S5: Principle component analysis, PC3 Vs PC4



## Supplementary material 7: Porcupine Plots

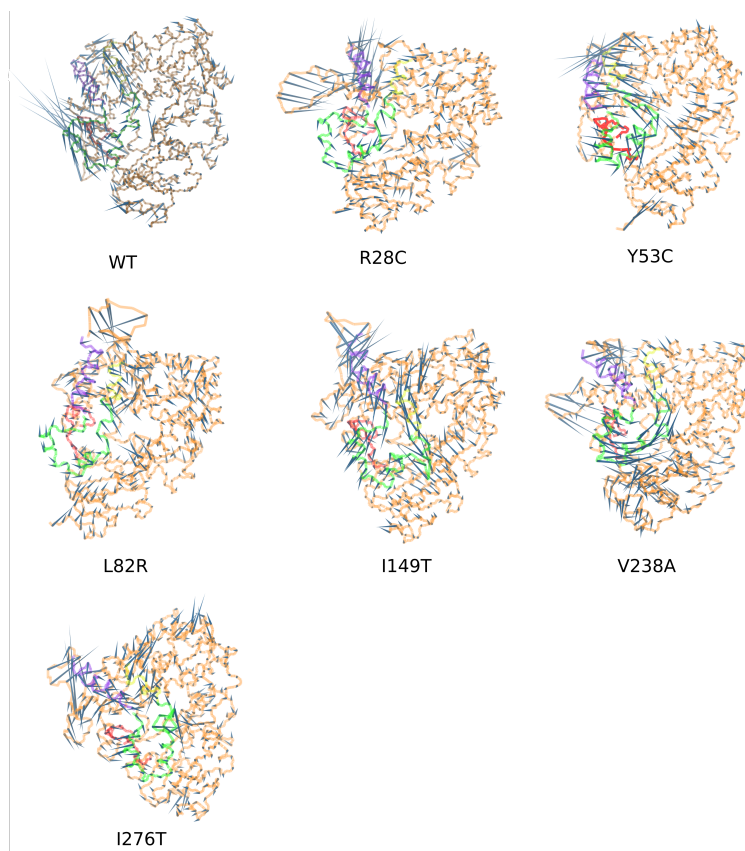

Figure S6: Porcupine plot corresponding to projections of  $C_{\alpha}$  atoms onto the first three non-rotational and non-translational normal modes. The segments in green, purple, yellow and red correspond respectively to the F/G loop, F helix, G helix and the B/C loop.

## Supplementary material 8: Free energy landscape of all CYP3A5 variants

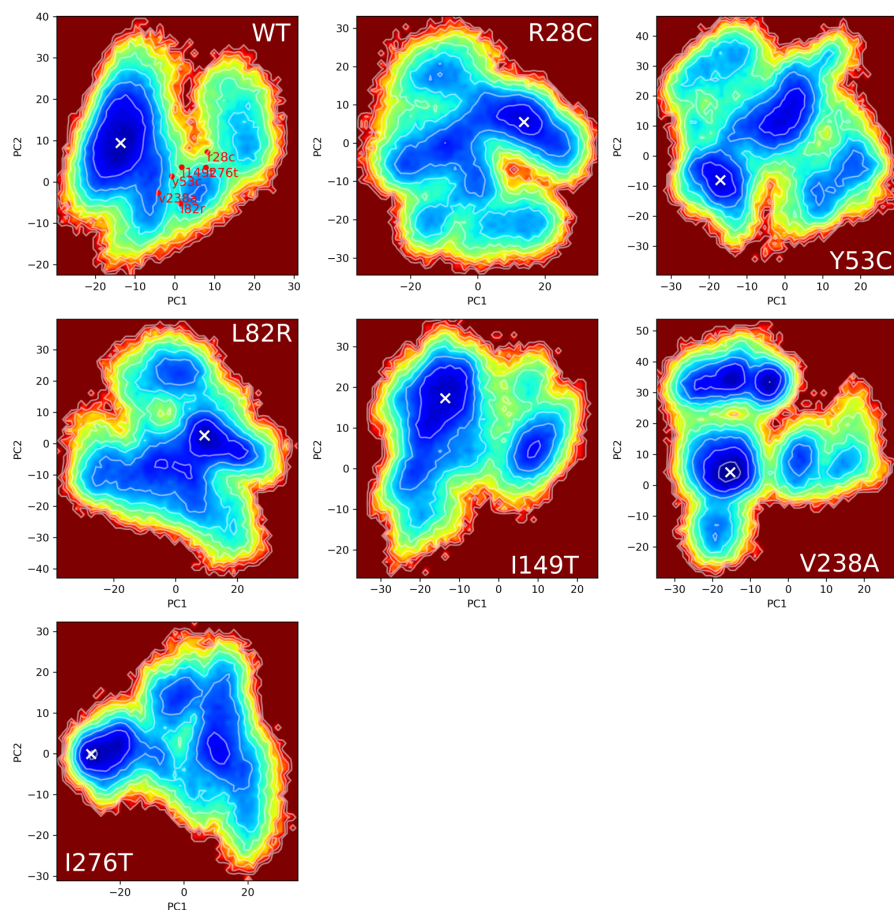

Figure S7: Free energy landscape of the wild type and CYP3A5 variants characterized from sub-Saharan African population. The white X marker indicates the position of the global minima. The position of the conformations at the local minimum of each variant was projected onto the free energy landscape of the wild-type form.

## Supplementary material 9: Convergence of MM-GBSA

The convergence of the MM-GBSA calculation was verified for the complex of CYP3A5/ritonavir for the wild type form for a total simulation time of 300 ns. We plotted the MM-GBSA energy over an increasing time step of 5 ns in two fashions: forward (all the frames below the upper boundary of the intervals are considered in the calculation) and backward (all the frames above the lower boundary of the interval are considered in the calculation). We can see from the plot that the energy converges at 100 ns simulation time both for the forward and backward calculations.

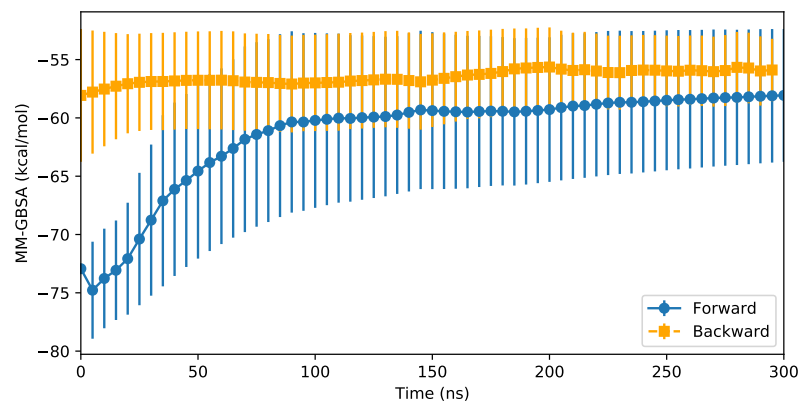

Figure S8: Convergence of the MM-GBSA energy for a simulation time of 300 ns calculated for the complex CYP3A5/ritonavir for the wild type form.
